# Supplementary material for: A combination of curcumin, vorinostat and silibinin reverses Aβ-induced nerve cell toxicity via activation of AKT-MDM2-p53 pathway
Source: PeerJ. 2019 Apr 26;7:e6716. doi: 10.7717/peerj.6716 (PMC6487801; doi:10.7717/peerj.6716)
Supplement: Data S1 [file peerj-07-6716-s002.xlsx]

## Sheet: data
Figure 1A (Cell viability assay, n = 5)
Ctrl	Aβ	resveratrol	piceatannol	genistein	quercetin	kaempferol	luteolin	apigenin	daidzein	silibinin
0.989841	0.491885	0.553841	0.581644	0.637069	0.53641	0.540518	0.566301	0.539315	0.567164	0.667959
0.864125	0.44576	0.502047	0.542379	0.507789	0.573224	0.502274	0.536251	0.639883	0.534458	0.639316
1.02867	0.533618	0.5705	0.556474	0.614622	0.598212	0.518116	0.60922	0.61292	0.60257	0.753398
1.05126	0.53842	0.553659	0.553523	0.534004	0.562057	0.506496	0.563373	0.506291	0.518933	0.646193
1.0661	0.523337	0.522883	0.543718	0.529941	0.576515	0.551866	0.514394	0.539882	0.500754	0.632825
Figure 1B (Cell viability assay, n = 5)
Ctrl	Aβ	C	CV	CVS
1.00339	0.511097	0.583378	0.670042	0.776199
0.986444	0.521859	0.574456	0.678596	0.776322
1.00025	0.496662	0.574872	0.678712	0.778962
1.0043	0.530785	0.570979	0.675381	0.780034
1.00562	0.515932	0.573724	0.668899	0.780615
Figure 1C (Relative Caspase 3 protein level, n = 5)
Ctrl	Aβ	C	CV	CVS
0.872483	1.87604	1.48394	1.33193	0.988737
1.11989	3.32655	2.09197	1.46476	1.15656
1.01953	2.07283	1.6224	1.51831	1.41916
1.04046	1.88534	1.49462	1.39123	1.43689
0.947638	1.71167	1.43394	1.26789	0.938909
Figure 1D (TUNEL assay, n = 5)
Ctrl	Aβ	C	CV	CVS
0.00684932	0.185185	0.160584	0.12987	0.0297619
0.00591716	0.15	0.203883	0.118182	0.0194805
0.00724638	0.166667	0.125	0.0989011	0.0289855
0.00591716	0.230159	0.171171	0.0961538	0.0379747
0.00636943	0.185629	0.0986842	0.0503597	0.0231214
Figure 2A (ROS production, fold change, n = 5)
Ctrl	Aβ	C	CV	CVS
1.32523	3.90421	2.32402	2.55773	1.95294
0.89241	3.3358	2.94115	2.43381	1.77348
0.706387	3.55499	2.9921	2.13992	1.75895
0.819544	4.16498	3.3845	1.95006	1.5671
1.25643	3.07502	2.18133	2.06318	1.50592
Figure 2B (SOD concentration, U/mgProt, n = 4)
Ctrl	Aβ	C	CV	CVS
26.5995	13.2458	16.7655	18.6412	23.1424
23.046	12.7915	17.7588	16.3912	20.6132
23.9988	12.3446	16.1874	20.5635	20.5055
23.3506	12.8825	16.9303	16.5455	22.1405
Figure 2C (MDA concentration, nM/mgProt, n = 4)
Ctrl	Aβ	C	CV	CVS
2.27568	6.05324	5.03703	4.8348	3.45741
2.31837	6.47412	5.64777	5.20969	3.09874
2.29986	6.76779	5.49101	4.72683	3.36621
2.48691	6.28572	5.1841	4.87157	3.30149
Figure 3A (Relative p-AKT protein level, n = 5)
Ctrl	Aβ	C	CV	CVS
1.02393	0.479738	0.565388	0.674118	0.767053
1.09554	0.682426	0.701058	1.00776	1.01898
0.75861	0.313991	0.306235	0.501164	0.816121
1.25619	0.445868	0.662122	1.13211	0.998143
0.865729	0.386322	0.793456	0.795104	1.18493
Figure 3B (Relative p-BAD protein level, n = 5)
Ctrl	Aβ	C	CV	CVS
1.20867	0.487694	0.6888	0.965638	1.00548
0.968269	0.369456	0.549444	0.746605	0.850659
0.778866	0.317222	0.418483	0.611474	0.646507
0.96492	0.408211	0.586173	0.778687	0.789247
1.07927	0.435586	0.630227	0.767902	0.908046
Figure 3C (Relative p-MDM2 protein level, n = 5)
Ctrl	Aβ	C	CV	CVS
0.940642	0.437778	0.589703	0.603637	1.03311
1.20752	0.458429	0.58075	0.702323	0.840706
0.934193	0.353173	0.430689	0.676265	0.807175
0.816811	0.350495	0.476644	0.581045	0.712402
1.10083	0.444087	0.638117	0.806715	1.06888
Figure 3D (Relative p53 protein level, n = 5)
Ctrl	Aβ	C	CV	CVS
0.828381	1.84459	1.52181	1.31784	1.12865
1.05395	2.3591	1.7514	1.48571	1.29918
1.0578	2.29307	1.71122	1.63515	1.44057
1.04016	1.88343	1.88004	1.56072	1.22873
1.01972	2.11542	1.66589	1.49271	1.06815
Figure 4 (Relative fluorescence intensity, n = 5)
Ctrl	Aβ	C	CV	CVS
2.23684	3.15789	1.97368	1.97368	1.31579
1.31579	2.63158	2.36842	1.31579	1.44737
-0.394737	2.63158	1.71053	1.71053	1.57895
0.526316	3.02632	1.71053	1.97368	1.57895
1.31579	3.02632	1.97368	1.44737	1.44737
